# Supplementary material for: Limbic-predominant age-related TDP-43 encephalopathy (LATE): consensus working group report
Source: Oxford University Press journal article supplement (doi:10.1093/brain/awz099), 2019-03-22
Supplement: awz099_supplementary_material.pdf [file awz099_supplementary_material.pdf]

## Genetic findings in TDP-43 proteinopathies

|                          | <i>TMEM106B</i><br>rs3173615<br>rs1990622 | <i>GRN</i><br>rs5848 | <i>ABCC9</i><br>rs704178 | <i>KCNMB2</i><br>rs9637454 | <i>APOE</i><br>ε4 haplotype |
|--------------------------|-------------------------------------------|----------------------|--------------------------|----------------------------|-----------------------------|
| FTLD-TDP                 | GWAS                                      | +                    | _*                       | _*                         | _*                          |
| HS-Aging                 | +                                         | +                    | GWAS                     | GWAS                       | +                           |
| TDP-43 in elderly cohort | +                                         | +                    |                          |                            | +                           |
| TDP-43 in AD             | +                                         | +*                   |                          |                            | +                           |

**GWAS = Evidence from genome-wide association study**

**\* = unpublished**

**+ = Evidence from candidate gene association study**

**- = No evidence from candidate gene association study**

**Supplemental Table 1. Genetics of LATE-NC like phenotypes.** Specific gene variants have been associated with risk for TDP-43 proteinopathy in aging. The neuropathologic phenotypes that have been the foci of prior studies have included frontotemporal lobar degeneration (FTLD-TDP), hippocampal sclerosis of aging (HS-Aging), TDP-43 proteinopathy in aging, and TDP-43 proteinopathy in those with comorbid Alzheimer's disease (AD). Note that two genes bearing disease-associated variants consistently associated with TDP-43 proteinopathy are *TMEM106B* and *GRN* (Baker *et al.* , 2006; Boeve *et al.* , 2006; Cruts *et al.* , 2006; Van Deerlin *et al.* , 2010); these were identified through gene-specific probes following the known associations between those genes and FTLD-TDP risk. *APOE* ε4 allele was previously associated with AD and Lewy body pathologies, but recent studies also showed *APOE* ε4 to be a risk factor in LATE-NC phenotype (Robinson *et al.* , 2018; Wennberg *et al.* , 2018; Yang *et al.* , 2018). Two genes that have been linked to LATE-NC like phenotype via GWAS studies are *ABCC9* and *KCNMB2* (Beecham *et al.* , 2014; Nelson *et al.* , 2014), both of which encode polypeptides that regulate potassium channels, but both of which require additional replication in other cohort studies.

## Future biomarkers may enable specific combinatorial biomarker-based diagnoses

|             |        | Future biomarkers    |         | Diagnoses                                     |
|-------------|--------|----------------------|---------|-----------------------------------------------|
| A $\beta$ + | P-Tau+ | $\alpha$ -Synuclein+ | TDP-43+ |                                               |
| +           | -      | -                    | -       | Presumed preclinical Alzheimer's disease (AD) |
| +           | +      | -                    | -       | "Pure" AD                                     |
| -           | -      | +                    | -       | "Pure" Lewy body disease (LBD)                |
| -           | -      | -                    | +       | "Pure" LATE                                   |
| +           | +      | +                    | -       | AD+LBD                                        |
| +           | +      | -                    | +       | AD+LATE                                       |
| +           | +      | +                    | +       | AD+LBD+LATE                                   |
| -           | -      | +                    | +       | LBD+LATE                                      |
| -           | +      | -                    | -       | "Pure" Tauopathy                              |
| -           | +      | -                    | +       | Tauopathy+LATE                                |
| -           | +      | +                    | -       | Tauopathy+LBD                                 |

**Supplemental Table 2. Future aging-related brain disease biomarkers may include a biomarker specific for TDP-43 proteinopathy (red column).** This is a somewhat simplified representation that leaves off some diseases such as FTLTDP and vascular pathologies. However, with these biomarkers, one could ascertain most of the known common combinations of proteinopathies in aged persons' brains.
